# Supplementary material
Source: ML conference proceedings conference paper supplement (https://openaccess.thecvf.com/content/CVPR2024/html/Liu_CDFormer_When_Degradation_CVPR_2024_paper.html)
Supplement: Supplementary file 1 [file Liu_CDFormer_When_Degradation_CVPR_2024_supplemental.pdf]

# CDFormer: When Degradation Prediction Embraces Diffusion Model for Blind Image Super-Resolution

## Supplementary Material

### 6. Preliminaries

Diffusion Models (DMs) rely on a long Markov chain of diffusion steps to generate samples. They first define a forward diffusion process that transforms the input image  $x_0$  to Gaussian noise  $x_T \sim \mathcal{N}(0, 1)$  over  $T$  iterations. Each iteration in the forward process can be described as follows:

$$q(x_t|x_{t-1}) = \mathcal{N}(x_t; \sqrt{1 - \beta_t}x_{t-1}, \beta_t\mathbf{I}), \quad (14)$$

where  $x_t$  is the noised image at time-step  $t$ ,  $\beta_t$  is the pre-defined scale factor. Using a reparameterization trick, the above equation can be simplified as:

$$q(x_t|x_0) = \mathcal{N}(x_t; \sqrt{\bar{\alpha}_t}x_0, (1 - \bar{\alpha}_t)\mathbf{I}), \quad (15)$$

where  $\alpha_t = 1 - \beta_t$ ,  $\bar{\alpha}_t = \prod_{i=0}^t \alpha_i$ .

The reverse diffusion process is then defined to recreate a sample from  $p(x_{t-1} | x_t)$  as follows:

$$p(x_{t-1}|x_t, x_0) = \mathcal{N}(x_{t-1}; \boldsymbol{\mu}_t(x_t, x_0), \sigma_t^2\mathbf{I}), \quad (16)$$

where  $\boldsymbol{\mu}_t(x_t, x_0) = \frac{1}{\sqrt{\alpha_t}}(x_t - \epsilon \frac{1 - \alpha_t}{\sqrt{1 - \bar{\alpha}_t}})$ ,  $\sigma_t^2 = \frac{1 - \bar{\alpha}_{t-1}}{1 - \bar{\alpha}_t} \beta_t$ .  $\epsilon$ , the added noise in the forward process to  $x_t$ , however, is unknown in the reverse process. Thus unconditional DMs are trained to predict noise  $\epsilon$  for each step, denoted as  $\epsilon_\theta(x_t, t)$ .

Simply, Eq. (16) can be rewritten as:

$$x_{t-1} = \frac{1}{\sqrt{\alpha_t}}(x_t - \frac{1 - \alpha_t}{\sqrt{1 - \bar{\alpha}_t}}\epsilon_\theta(x_t, t)) + \sqrt{1 - \alpha_t}\epsilon_t, \quad (17)$$

where  $\epsilon_t \sim \mathcal{N}(0, I)$  is the added noise at step  $t$ .

The training of DMs uses the variational lower bound to optimize the negative log-likelihood:

$$\nabla_\theta \|\epsilon - \epsilon_\theta(\sqrt{\bar{\alpha}_t}x_0 + \epsilon\sqrt{1 - \bar{\alpha}_t}, t)\|_2^2. \quad (18)$$

where  $\theta$  is the parameters of the network.

### 7. Algorithm

We provide the training and inference algorithms of  $CDFormer_{stage2}$  in Algorithm 1 and Algorithm 2, respectively. Notice that during training  $\hat{Z}_T$  is computed from  $Z_0$ , which is predicted by  $E_{GT}$ , while  $\hat{Z}_T$  during inference is sampled from Gaussian noise.

### 8. Discussion

Our research has revealed an inherent drawback in the application of diffusion models (either in the pixel space or latent

---

#### Algorithm 1 $CDFormer_{stage2}$ Training

---

**Input:** Trained  $CDFormer_{stage1}$  (including  $E_{GT}$  and  $CDFormer_{SR}$ ), timesteps  $T$ , schedule  $\beta_t, \alpha_t$  ( $t \in [1, T]$ ),  $I_{LR}, I_{HR}$ .

**Output:** Trained  $CDFormer_{stage2}$ .

- 1: **Init:** Forzen  $E_{GT}$ .
  - 2: **for**  $I_{LR}, I_{HR}$  **do**
  - 3:  $Z_0 = E_{GT}(\text{Concat}((I_{HR}) \downarrow_s, I_{LR}), I_{HR})$ .
  - 4: **Forward Process:**
  - 5: Sample  $Z_T$  by  $q(Z_T|Z_0) = \mathcal{N}(Z_T; \sqrt{\bar{\alpha}_T}Z_0, (1 - \bar{\alpha}_T)\mathbf{I})$
  - 6: **Reverse Process:**
  - 7:  $\hat{Z}_T = Z_T$
  - 8:  $c = E_{LR}(I_{LR})$
  - 9: **for**  $t = T$  to 1 **do**
  - 10:  $\hat{Z}_{t-1} = \frac{1}{\sqrt{\alpha_t}}(\hat{Z}_t - \frac{1 - \alpha_t}{\sqrt{1 - \bar{\alpha}_t}}\epsilon_\theta(\hat{Z}_t, t, c)) + \sqrt{1 - \alpha_t}\epsilon_t$
  - 11: **end for**
  - 12:  $I_{SR} = CDFormer_{SR}(I_{LR}, \hat{Z}_0)$
  - 13: Calculate  $\mathcal{L}_{\text{diff}}$  and  $\mathcal{L}_{\text{rec}}$
  - 14: **end for**
  - 15: Output the trained model  $CDFormer_{stage2}$ .
- 

---

#### Algorithm 2 $CDFormer_{stage2}$ Inference

---

**Input:** Trained  $CDFormer_{stage2}$  (including  $E_{LR}$  and  $CDFormer_{SR}$ ), timesteps  $T$ , schedule  $\beta_t, \alpha_t$  ( $t \in [1, T]$ ),  $I_{LR}$ .

**Output:** Reconstructed SR images  $I_{SR}$ .

- 1: Sample  $\hat{Z}_T \sim \mathcal{N}(0, 1)$
  - 2:  $c = E_{LR}(I_{LR})$
  - 3: **for**  $t = T$  to 1 **do**
  - 4:  $\hat{Z}_{t-1} = \frac{1}{\sqrt{\alpha_t}}(\hat{Z}_t - \frac{1 - \alpha_t}{\sqrt{1 - \bar{\alpha}_t}}\epsilon_\theta(\hat{Z}_t, t, c)) + \sqrt{1 - \alpha_t}\epsilon_t$
  - 5: **end for**
  - 6:  $I_{SR} = CDFormer_{SR}(I_{LR}, \hat{Z}_0)$
  - 7: **return** Reconstruct SR images  $I_{SR}$ .
- 

space) for Blind image Super-Resolution (BSR): their generated SR images often exhibit inconsistencies with desired content. We attribute this phenomenon to the designing goal of diffusion models, *i.e.*, DMs are essentially intended for

image synthesis rather than image reconstruction. This generative model type leads to an overemphasis on diversity, which we assume to be counterproductive for BSR.

To be specific, when LR images of extremely low quality are input, a scarcity of information can be utilized for reconstruction. In this case, applying diffusion models to reconstruct images will further exacerbate this scarcity, making degradation estimation more difficult and leading to a dominant role of randomness in the reverse process. This explains why traditional deep learning methods can outperform diffusion-based SR approaches in widely used metrics such as PSNR and SSIM. We instead propose a diffusion-based estimator to predict high-level representation. The conditional vector produced by LR images is able to prevent excessive diversity. CDFormer therefore has the ability to achieve a new state-of-the-art performance.

However, our experiments in more complex degradation scenarios, as demonstrated in Tab. 3, revealed only modest performance improvements. We suspect that in situations where degradation reaches a certain level, both traditional deep learning methods and our proposed CDFormer struggle to reconstruct high-resolution images effectively. Therefore, it may be helpful to allow for more diversity in the diffusion process, which we have left as future work.

## 9. Experiment Settings

All experiments are conducted on GeForce RTX 4090 GPU. The size of the Gaussian kernel is fixed to  $21 \times 21$ . We first train our method on noise-free degradation with isotropic Gaussian kernels only. The ranges of the kernel widths  $\sigma$  are set to  $[0.2, 2.0]$ ,  $[0.2, 3.0]$ , and  $[0.2, 4.0]$  for  $\times 2/3/4$  SR, respectively. Then, our method is trained on more general types of degradation with anisotropic Gaussian kernels and noise. Anisotropic Gaussian kernels characterized by a Gaussian probability density function  $N(0, \Sigma)$  (with zero mean and varying covariance matrix  $\Sigma$ ) are considered. The covariance matrix  $\Sigma$  is determined by two random eigenvalues  $\lambda_1, \lambda_2 \sim U(0.2, 4)$  and a random rotation angle  $\Theta \sim U(0, \pi)$ . The noise level ranges from 0 to 25.

## 10. Additional Ablation Study

### 10.1. Effects of Iterations Number.

We performed an ablation study on iteration numbers in our redesigned diffusion model. As plotted in Fig. 9, six settings,  $T = \{1, 2, 4, 8, 16, 32\}$  respectively, have been tested. The variance hyperparameters are varied as  $T$  changes. The PSNR results indicate that a single iteration step is insufficient to generate a meaningful prior representation, thus limiting the Super-Resolution performance. However, when increasing to 2 steps, CDFormer can reach a fantastic result and the curve actually has converged. This finding verifies that treating the diffusion process as a vector

estimator can address the problem of increased time cost in large numbers of iterations  $T$  (1,000 for example). Meanwhile, the dimension of the latent space  $C = 256$  is small. Therefore, the computational complexity is also reasonable.

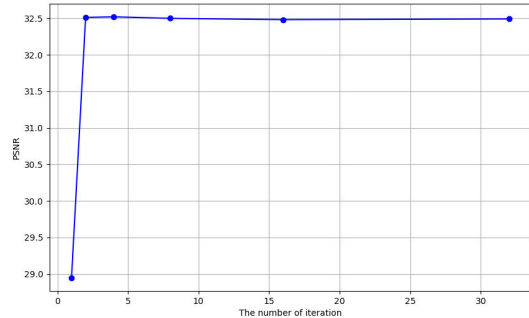

Figure 9. PSNR ( $\uparrow$ ) results for different settings of iterations number,  $T = \{1, 2, 4, 8, 16, 32\}$  respectively.

**Effects of Content-aware Degradation-driven Refinement Block (CDRB).** We also conduct an ablation study on CDRB to validate the efficiency of  $CDFormer_{SR}$  module. As listed in Tab. 6, model5 adopted SwinIR as the SR network, without any proposed module, is inferior to other models. We gradually append the designed module from model6 to model9, resulting in improvements in PSNR and SSIM. Specifically, model6 demonstrates the advantages of integrating spatial attention and channel attention, model9 proves the capacity of CDP and the injection manner.

The Fourier visualization in Fig. 10 further explains how features are modified after depth-wise convolution, self-attention, and fusion. It is obvious that depth-wise convolution focuses on low-frequency information while lacking image edge details. In contrast, self-attention prioritizes high-frequency information but lacks structural information. For example, the sewing of the hat is invisible in Fig. 10a while clear in Fig. 10b, but the nose region represents an opposite phenomenon. By incorporating spatial and channel interactions to fuse two types of feature maps, the results in Fig. 10c exhibit an improved representation with both high- and low-frequency information, indicating the benefits of proposed intra- and inter-path aggregation techniques.

## 11. More Visualization Results

### 11.1. Results of Local Attention Map.

To further demonstrate the effectiveness of CDFormer, we utilize integral gradient analysis, LAM, to visualize the pixel influence in Super-Resolution results. As shown in Fig. 11, LAM maps (column 2) exhibit the importance of each pixel in the input LR image w.r.t. the output SR image

Table 6. Ablation study of CDRB on Set5 for different kernel widths are shown. Best in **bold**.

| Method | GT CDP   | SW-SA    | CW-SA    | CDIM     | 0               |                 | 1.2             |                 | 2.4             |                 | 3.6             |                 |
|--------|----------|----------|----------|----------|-----------------|-----------------|-----------------|-----------------|-----------------|-----------------|-----------------|-----------------|
|        |          |          |          |          | PSNR $\uparrow$ | SSIM $\uparrow$ |
| model5 | <b>x</b> | <b>x</b> | <b>x</b> | <b>x</b> | 31.843          | 0.8918          | 31.936          | 0.8907          | 31.692          | 0.8856          | 30.074          | 0.8493          |
| model6 | <b>x</b> | <b>✓</b> | <b>✓</b> | <b>x</b> | 32.114          | 0.8950          | 32.074          | 0.8922          | 32.006          | 0.8894          | 30.712          | 0.8646          |
| model7 | <b>✓</b> | <b>x</b> | <b>✓</b> | <b>✓</b> | 32.344          | 0.8968          | 32.432          | 0.8968          | 32.268          | 0.8919          | 31.042          | 0.8681          |
| model8 | <b>✓</b> | <b>✓</b> | <b>x</b> | <b>✓</b> | 32.413          | 0.8977          | 32.515          | 0.8980          | 32.335          | <b>0.8928</b>   | 31.083          | 0.8685          |
| model9 | <b>✓</b> | <b>✓</b> | <b>✓</b> | <b>✓</b> | <b>32.485</b>   | <b>0.8980</b>   | <b>32.564</b>   | <b>0.8981</b>   | <b>32.393</b>   | 0.8926          | <b>31.175</b>   | <b>0.8688</b>   |

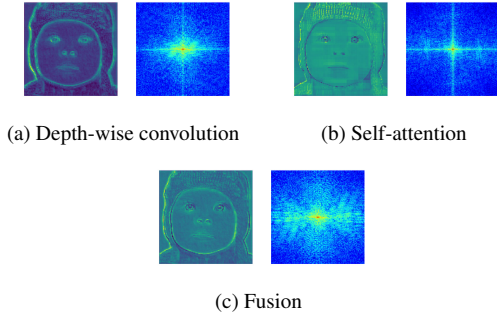

as general degradation scenarios involving Isotropic Gaussian Kernels under noise-free degradation in Figs. 13 to 17.

Figure 10. Visualization results for feature maps and Fourier plots

within the region marked with a red box. Compared to the state-of-the-art degradation prediction (DP) method KDSR, CDFormer presents a stronger relationship on both global and local representations. The proposed CDP and adaptive SR network ensure a better use of LR pixels, and can significantly enhance the quality of reconstruction results. Other quantitative metrics as DI, PSNR, and SSIM, also indicate that our method achieves remarkable superiority.

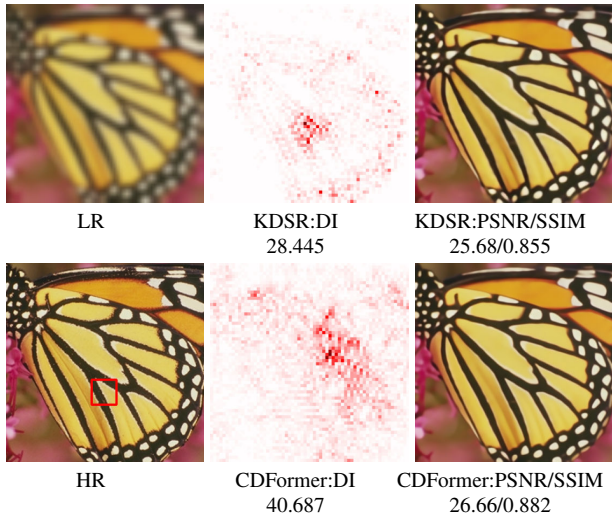

Figure 11. The result of LAM.

## 11.2. More Visualization Results.

We provide additional visual results in complicated degradation scenarios involving Anisotropic Gaussian Kernels, diverse noises, and real-world conditions in Fig. 12, as well

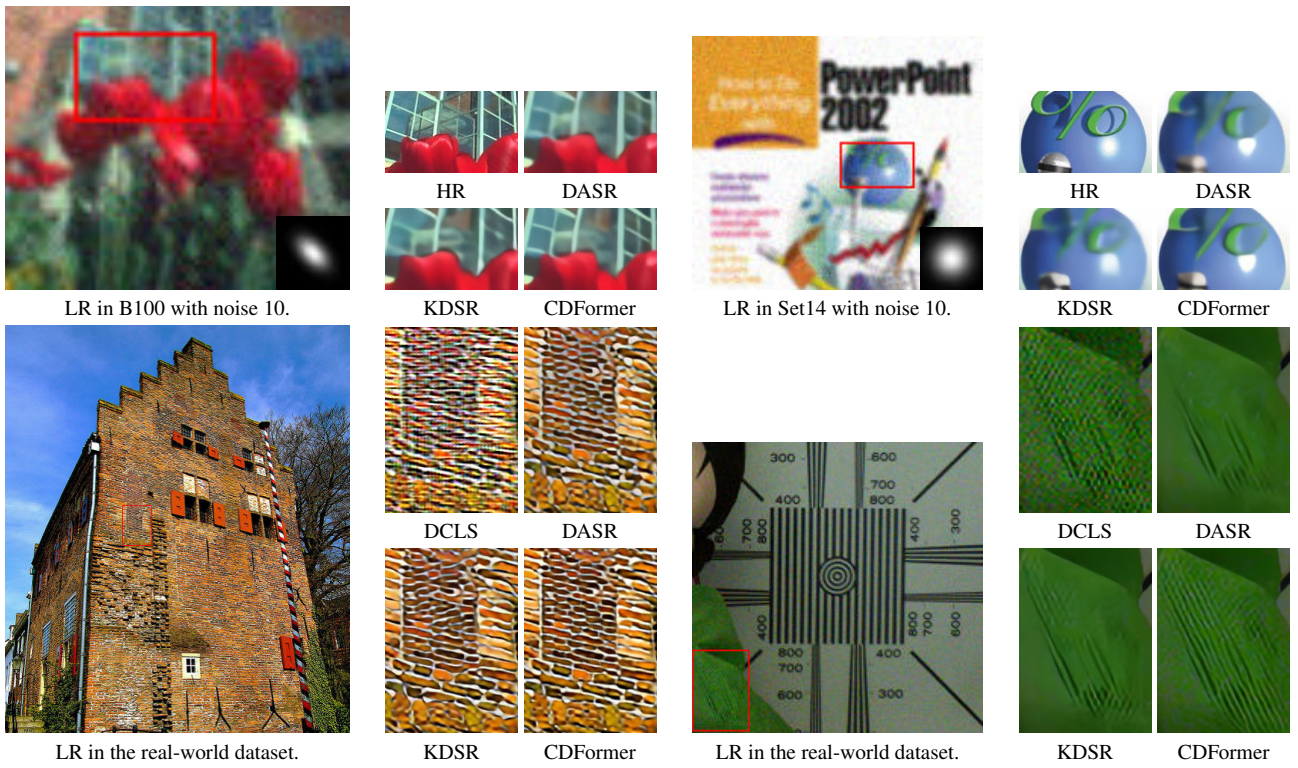

Figure 12. Visualization of different anisotropic Gaussian kernels and noises.

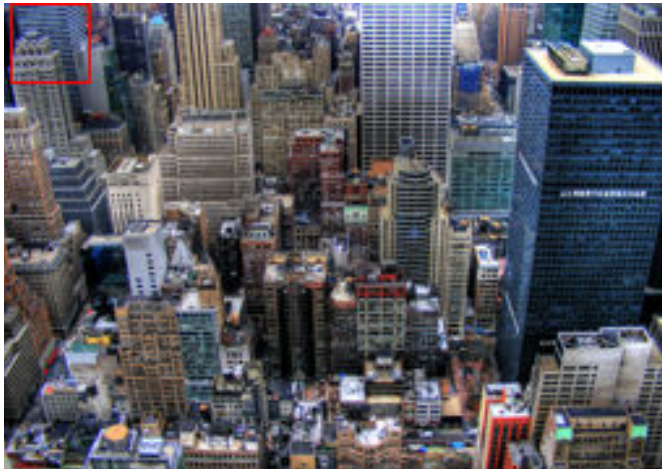

LR Img 73 in Urban100

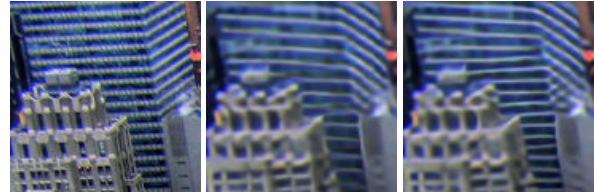

GT PSNR(↑)/SSIM(↑)      DASR 19.97/0.5494      KDSR 20.26/0.5820

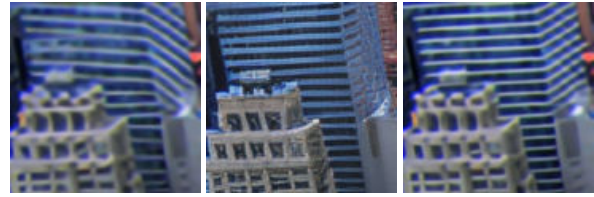

DCLS 20.34/0.5863      StableSR 16.92/0.4142      Ours **21.61/0.6427**

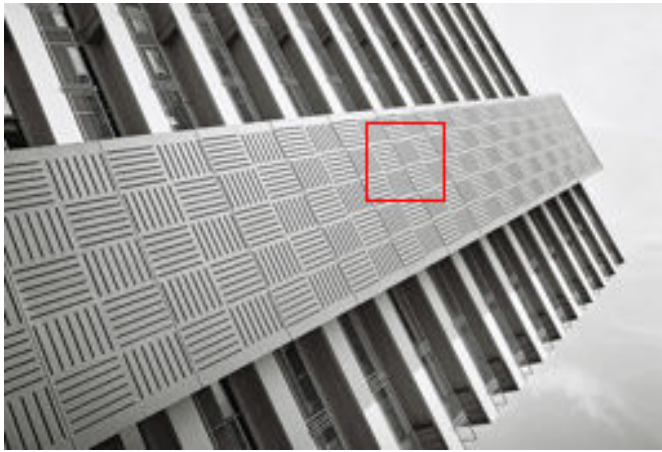

LR Img 92 in Urban100

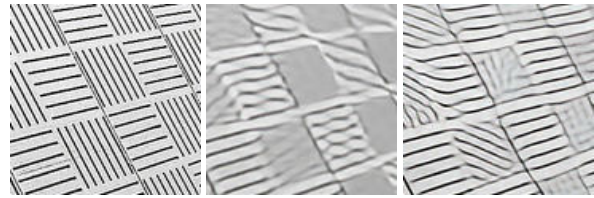

GT PSNR(↑)/SSIM(↑)      DASR 18.72/0.6407      KDSR 19.81/0.7066

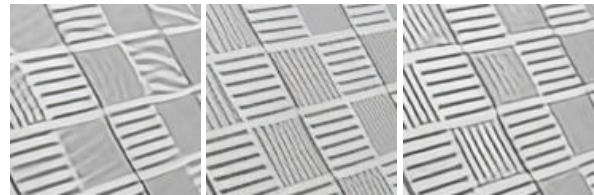

DCLS 19.46/0.6777      StableSR 16.63/0.5832      Ours **20.09/0.7075**

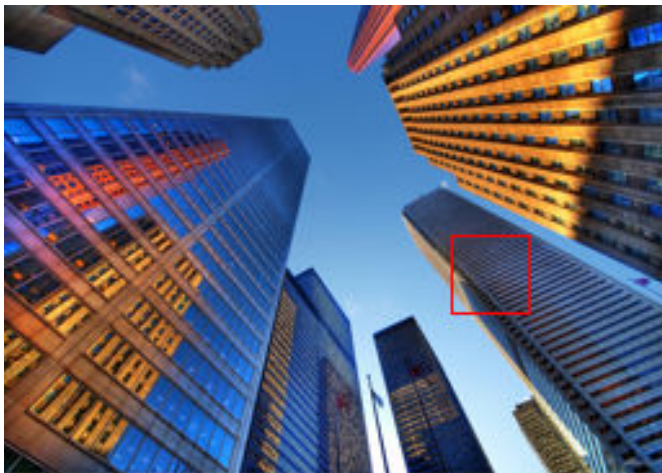

LR Img 12 in Urban100

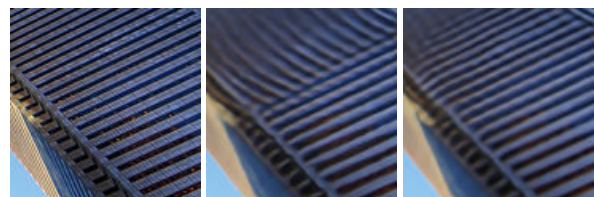

GT PSNR(↑)/SSIM(↑)      DASR 23.72/0.7251      KDSR 23.93/0.7394

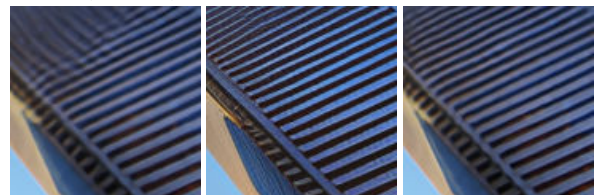

DCLS 24.15/0.7499      StableSR 19.15/0.5966      Ours **24.64/0.7817**

Figure 13. Visual results of Imgs in Urban100, for scale factor 4 and kernel width 0. Best marked in **red**.

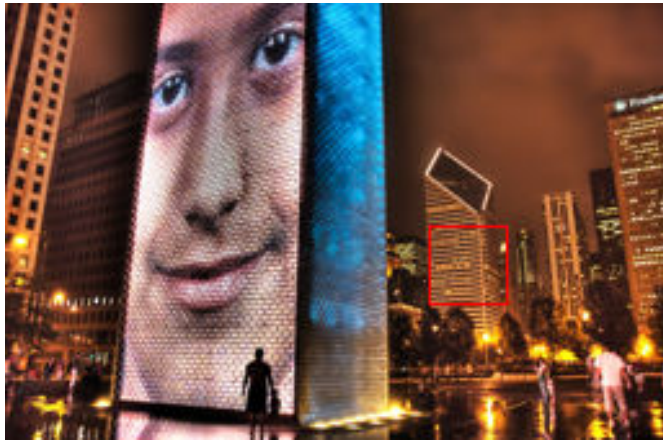

LR Img 76 in Urban100

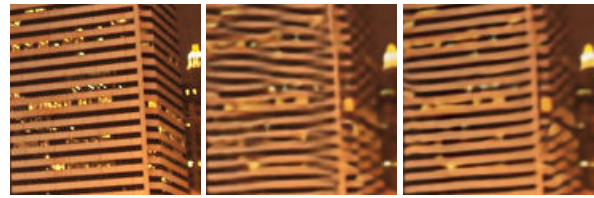

GT PSNR(↑)/SSIM(↑) DASR 22.61/0.7207 KDSR 24.21/0.7877

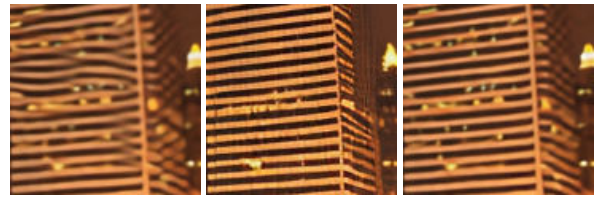

DCLS 23.84/0.7676 StableSR 19.66/0.6205 Ours **24.92/0.8119**

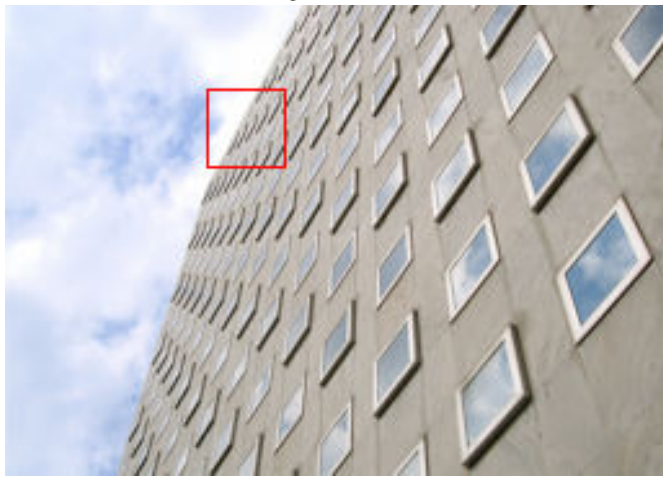

LR Img 10 in Urban100

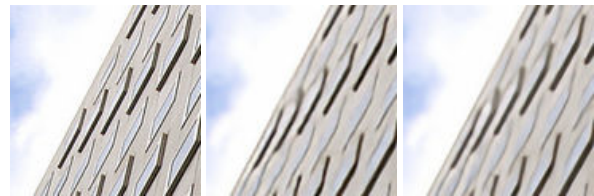

GT PSNR(↑)/SSIM(↑) DASR 26.91/0.8823 KDSR 27.14/0.8847

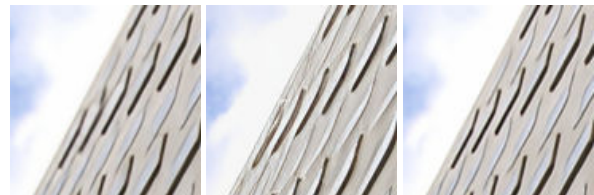

DCLS 27.46/0.8930 StableSR 23.06/0.8306 Ours **28.78/0.9123**

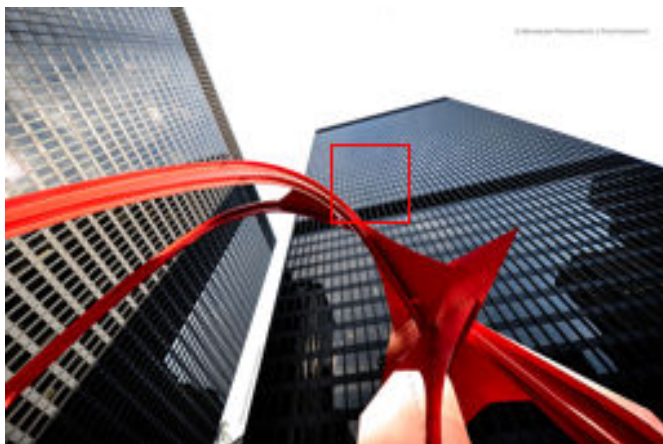

LR Img 62 in Urban100

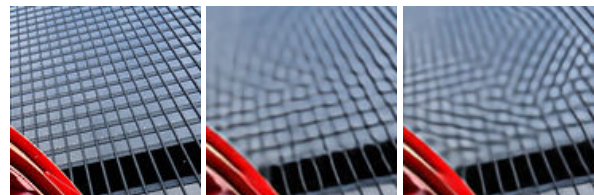

GT PSNR(↑)/SSIM(↑) DASR 21.15/0.7884 KDSR 22.51/0.8328

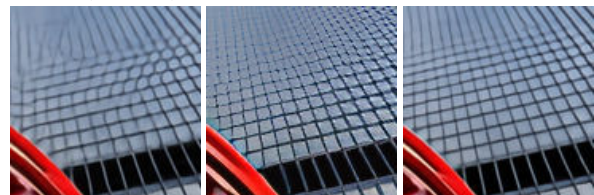

DCLS 21.70/0.8209 StableSR 18.15/0.6542 Ours **23.51/0.8762**

Figure 14. Visual results of Imgs in Urban100, for scale factor 4 and kernel width 0. Best marked in **red**.

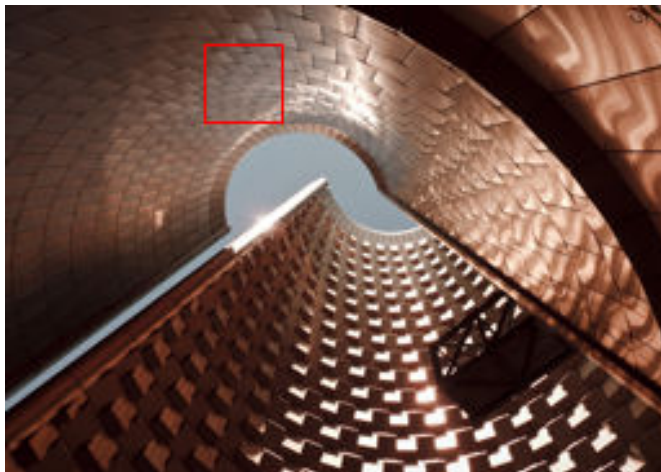

LR Img 57 in Urban100

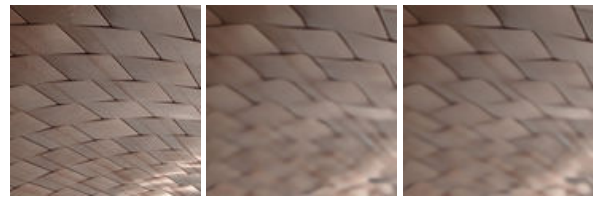

GT PSNR(↑)/SSIM(↑) DASR 30.76/0.8941 KDSR 30.84/0.8979

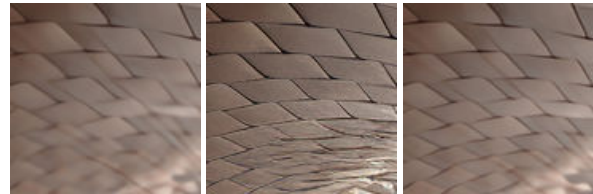

DCLS 31.34/0.9035 StableSR 23.52/0.7447 Ours **32.68/0.9258**

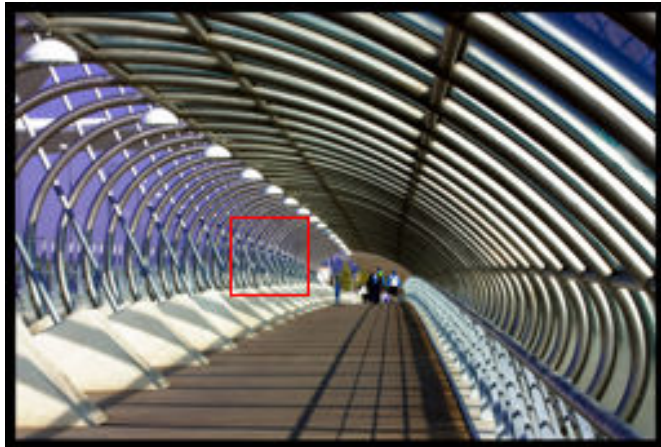

LR Img 58 in Urban100

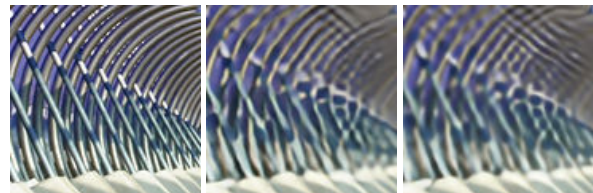

GT PSNR(↑)/SSIM(↑) DASR 25.39/0.8491 KDSR 26.07/0.8610

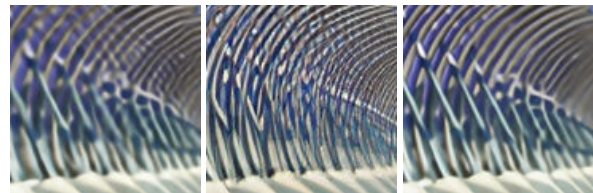

DCLS 26.18/0.8627 StableSR 20.12/0.6958 Ours **27.41/0.8937**

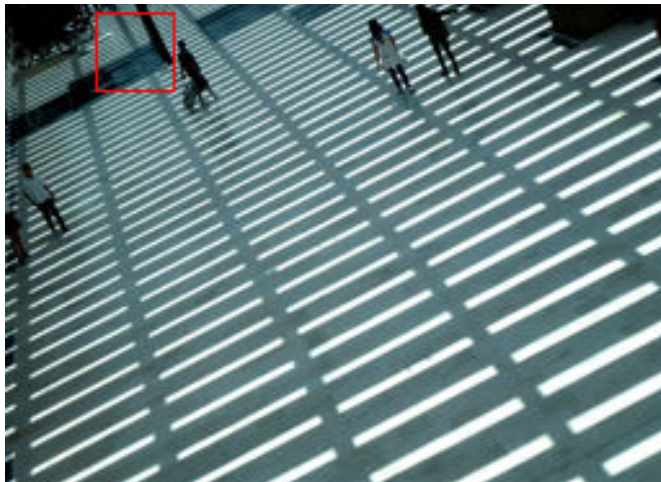

LR Img 93 in Urban100

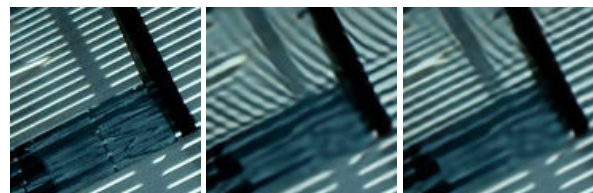

GT PSNR(↑)/SSIM(↑) DASR 28.44/0.9251 KDSR 30.39/0.9372

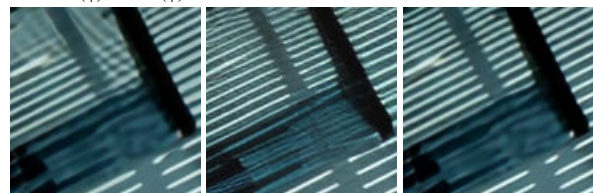

DCLS 30.62/0.9382 StableSR 23.51/0.7976 Ours **32.28/0.9471**

Figure 15. Visual results of Imgs in Urban100, for scale factor 4 and kernel width 0. Best marked in red.

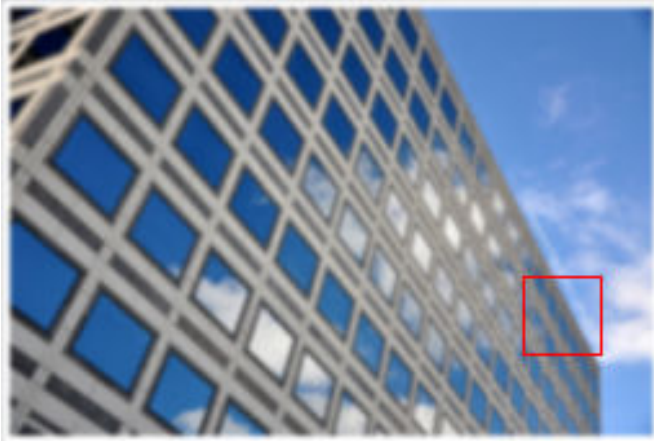

LR Img 35 in Urban100

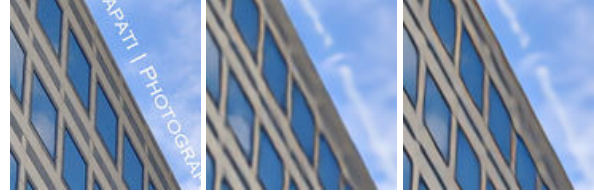

|                 |              |              |
|-----------------|--------------|--------------|
| GT              | DASR         | KDSR         |
| PSNR(↑)/SSIM(↑) | 26.69/0.8066 | 25.93/0.8147 |

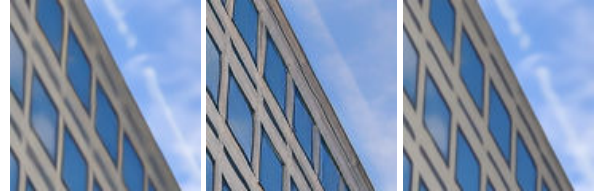

|              |              |                     |
|--------------|--------------|---------------------|
| DCLS         | StableSR     | Ours                |
| 28.02/0.8448 | 19.46/0.6561 | <b>28.56/0.8583</b> |

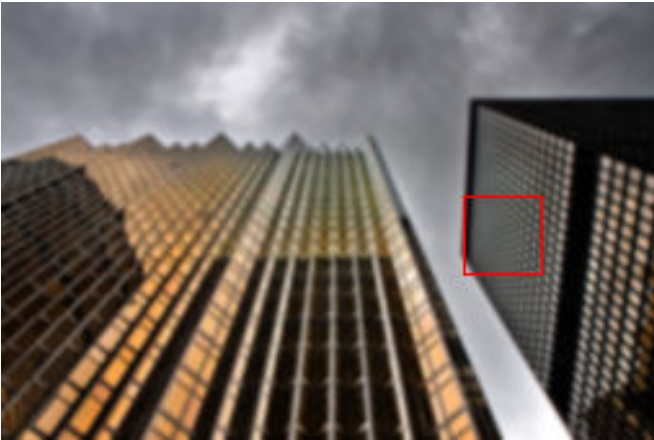

LR Img 19 in Urban100

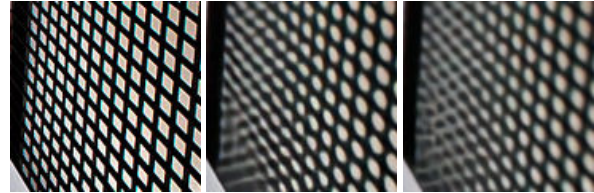

|                 |              |              |
|-----------------|--------------|--------------|
| GT              | DASR         | KDSR         |
| PSNR(↑)/SSIM(↑) | 20.63/0.7377 | 20.62/0.7496 |

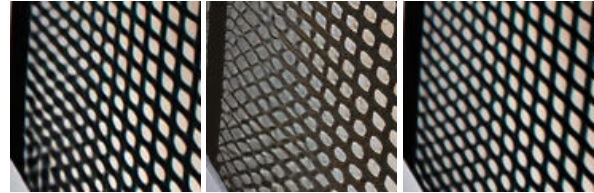

|              |              |                     |
|--------------|--------------|---------------------|
| DCLS         | StableSR     | Ours                |
| 21.86/0.7812 | 16.21/0.5491 | <b>22.06/0.7990</b> |

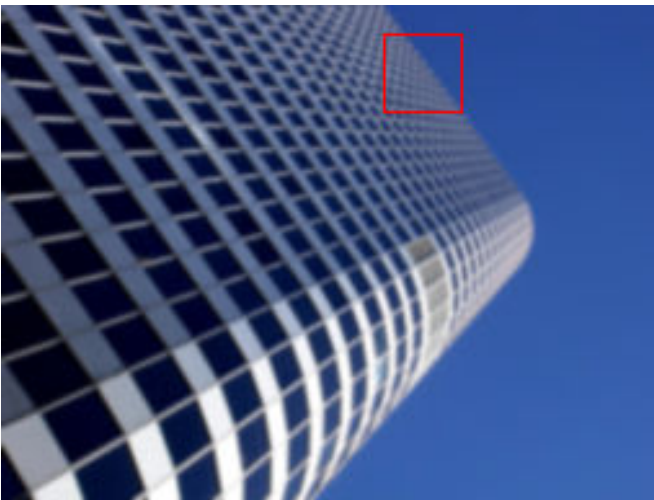

LR Img 5 in Urban100

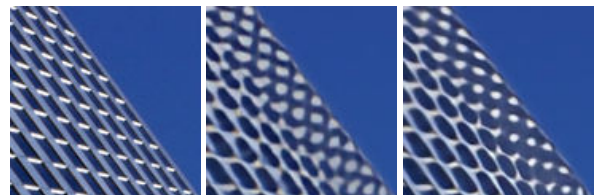

|                 |              |              |
|-----------------|--------------|--------------|
| GT              | DASR         | KDSR         |
| PSNR(↑)/SSIM(↑) | 25.71/0.9187 | 26.21/0.9289 |

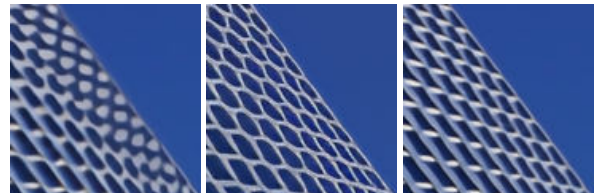

|              |              |                     |
|--------------|--------------|---------------------|
| DCLS         | StableSR     | Ours                |
| 27.27/0.9380 | 20.33/0.7438 | <b>28.70/0.9550</b> |

Figure 16. Visual results of Imgs in Urban100, for scale factor 4 and kernel width 3.6. Best marked in red.



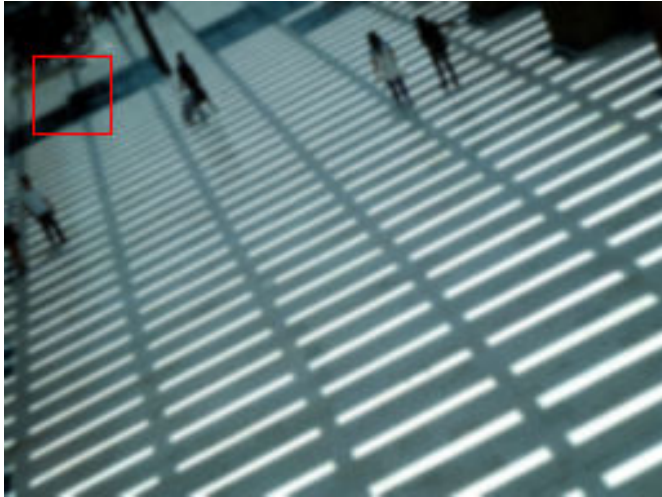

LR Img 93 in Urban100

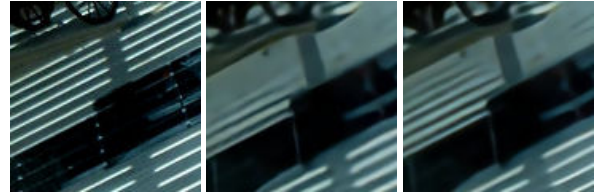

|                 |              |              |
|-----------------|--------------|--------------|
| GT              | DASR         | KDSR         |
| PSNR(↑)/SSIM(↑) | 27.12/0.8956 | 28.19/0.9078 |

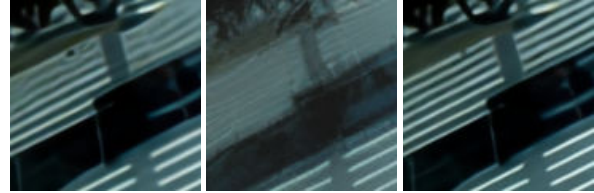

|              |              |                     |
|--------------|--------------|---------------------|
| DCLS         | StableSR     | Ours                |
| 28.57/0.9140 | 21.01/0.7567 | <b>29.41/0.9226</b> |

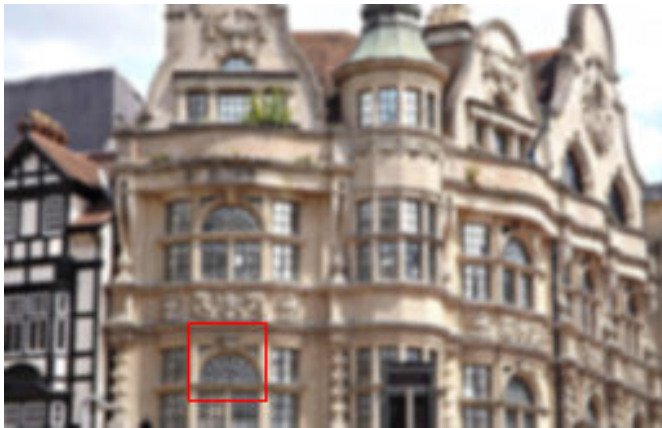

LR Img 53 in Urban100

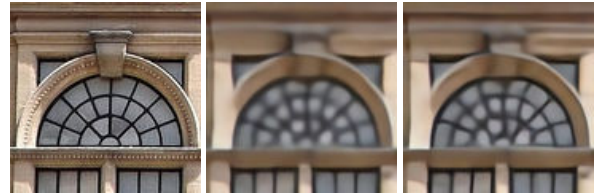

|                 |              |              |
|-----------------|--------------|--------------|
| GT              | DASR         | KDSR         |
| PSNR(↑)/SSIM(↑) | 21.83/0.6797 | 22.14/0.7048 |

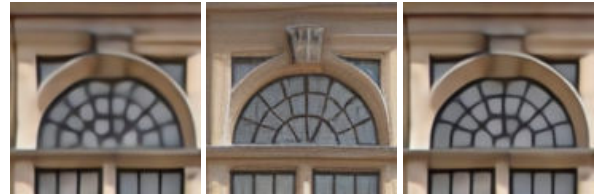

|              |              |                     |
|--------------|--------------|---------------------|
| DCLS         | StableSR     | Ours                |
| 22.10/0.6981 | 16.80/0.4696 | <b>22.39/0.7147</b> |

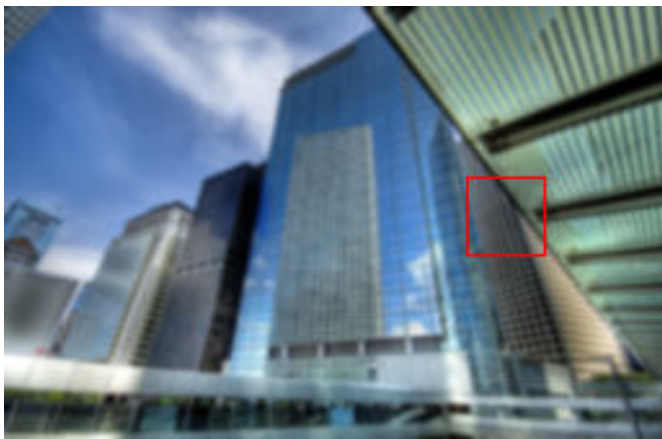

LR Img 61 in Urban100

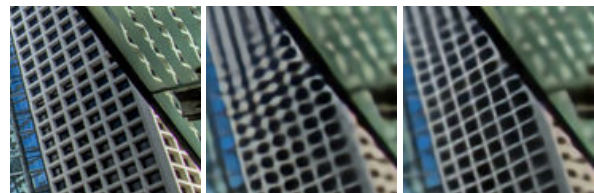

|                 |              |              |
|-----------------|--------------|--------------|
| GT              | DASR         | KDSR         |
| PSNR(↑)/SSIM(↑) | 23.84/0.6942 | 24.13/0.7158 |

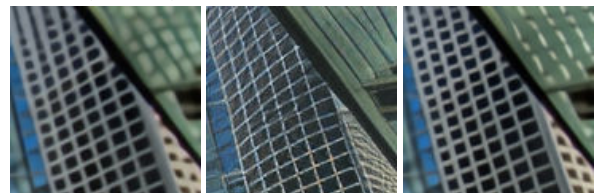

|              |              |                     |
|--------------|--------------|---------------------|
| DCLS         | StableSR     | Ours                |
| 24.02/0.7079 | 18.98/0.4849 | <b>24.60/0.7329</b> |

Figure 17. Visual results of Imgs in Urban100, for scale factor 4 and kernel width 3.6. Best marked in **red**.
